# Supplementary material for: Steps to ensure accuracy in genotype and SNP calling from Illumina sequencing data
Source: PubMed Central journal article supplement (PMC3535703; doi:10.1186/1471-2164-13-s8-s8), 2012-12-17

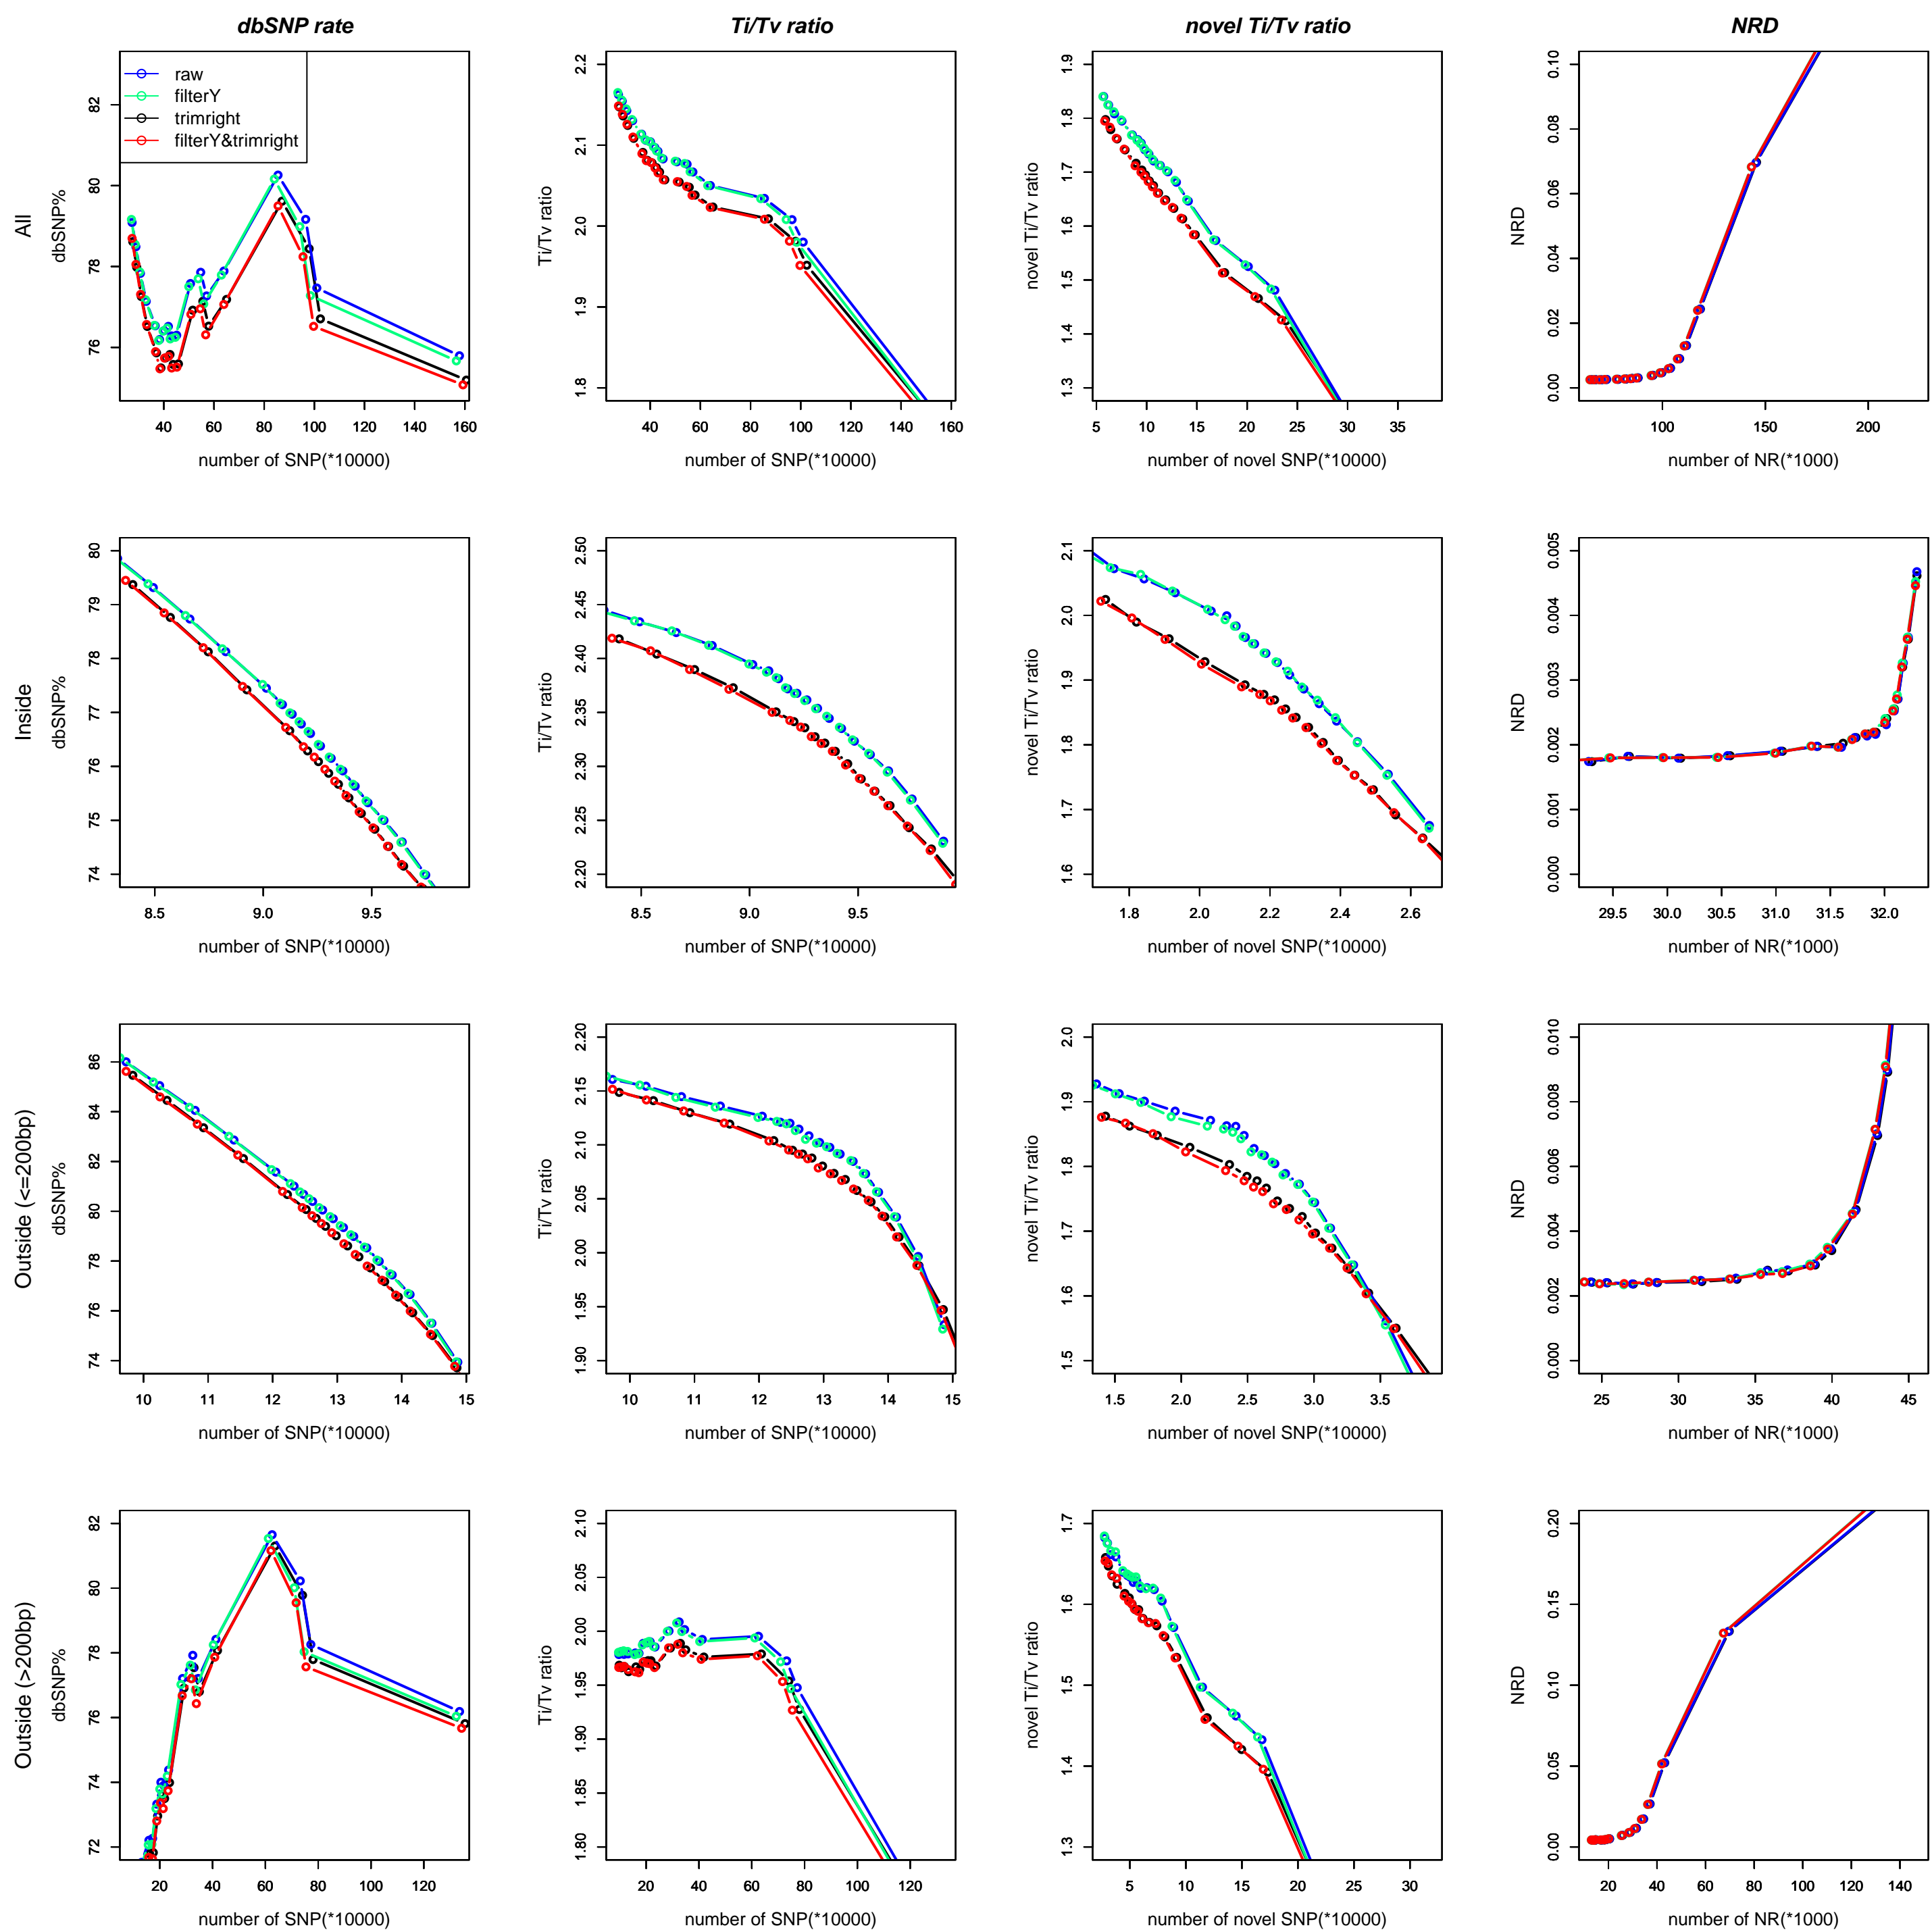

Supplement: 1471-2164-13-S8-S8-S1.pdf [file 1471-2164-13-S8-S8-S1.pdf]
